# Supplementary material
Source: PubMed Central journal article supplement (PMC3094906)
Supplement: NIHMS288633-supplement-Supplementary_Data.pdf [file NIHMS288633-supplement-Supplementary_Data.pdf]

**Supp Table 1.** Primer and probe sequences and distance from transcriptional start site

| <b>Primers and Probes</b> | <b>Sequences</b>                 | <b>Distance to transcriptional start site</b> |
|---------------------------|----------------------------------|-----------------------------------------------|
| APC1 Ext F(2)             | AAAACCCTATACCCCACTAC             | -142 to +14 Transcript variant 2              |
| APC1 Ext R(2)             | GGTTGTATTAATATAGTTATATGT         |                                               |
| APC1 FM                   | AATACGAACCAAAACGCTCCC            |                                               |
| APC1 FUM                  | TAAATACAAACCAAAACACTCCC          |                                               |
| APC1 RM                   | TATGTCGGTTACGTGCGTTTATAT         |                                               |
| APC1 RUM                  | GTTATATGTTGGTTATGTGTGTTT         |                                               |
| APC1 UM Probe             | 6FAM-TTCCCATCAAAAACCCACCAATTAAC  |                                               |
| APC1 M Probe              | VIC-CCCGTCGAAAACCCGCCGATTA       |                                               |
|                           |                                  |                                               |
| BRCA1 Ext F               | TATTTTGAGAGGTTGTTGTTTAG          | -20 to +226                                   |
| BRCA1 Ext R               | AAACATCACTTAAACCCCTAT            |                                               |
| BRCA1 FM                  | TTTCGTGGTAACGGAAAAGCG            |                                               |
| BRCA1 FUM                 | TGGTAATGGAAAAGTGTGGGAA           |                                               |
| BRCA1 RM                  | CCGTCCAAAAAATCTCAACGAA           |                                               |
| BRCA1 RUM(4)              | CCCATCCAAAAAATCTCAACAAA          |                                               |
| BRCA1 UM Probe            | 6FAM-CTCACACCACACAATCACAATTTTAAT |                                               |
| BRCA1 M Probe             | VIC-CTCACGCCGCGCAATCGCAATTT      |                                               |
|                           |                                  |                                               |
| CDH1 Ext F                | TAATTTTAGGTTAGAGGGTAT            | -182 to +34                                   |
| CDH1 Ext R                | AACTCACAATACTTTACAATTC           |                                               |
| CDH1 FM                   | AGGGTTATCGCGTTTATGCGAG           |                                               |
| CDH1 FUM                  | GAGGGTTATTGTGTTTATGTGAG          |                                               |
| CDH1 RM                   | ACAACCAATCAACAACGCGAAC           |                                               |
| CDH1 RUM                  | CACAACCAATCAACAACACAAAC          |                                               |
| CDH1 UM Probe             | 6FAM-CTCCCCAAAACAAAATAACAACCCAC  |                                               |
| CDH1 M Probe              | VIC-CCCAAACGAAACTAACGACCCGC      |                                               |
|                           |                                  |                                               |
| CYCLIN D2 Ext F           | TATTTTTTGTAAGATAGTTTTGAT         | -1169 to -880                                 |
| CYCLIN D2 Ext R           | TACAACCTTCTAAAAAATAACCC          |                                               |
| CYCLIN D2 FM              | TTTGATTAAGGATGCGTTAGAGTACG       |                                               |
| CYCLIN D2 FUM2            | TTAAGGATGTGTTAGAGTATGTG          |                                               |
| CYCLIN D2 RM              | ACTTTCTCCCTAAAAACCGACTACG        |                                               |
| CYCLIN D2 RUM2            | AAACTTTCTCCCTAAAAACCAACTACAAT    |                                               |
| CCND2 UM Probe            | 6FAM-AAATCACCACCAACACAATCAACCCTA |                                               |
| CYCLIN D2 M Probe         | VIC-CGCCGCAACACGATCGACCCTA       |                                               |

| <b>Primers and Probes</b> | <b>Sequences</b>                  | <b>Distance to transcriptional start site</b> |
|---------------------------|-----------------------------------|-----------------------------------------------|
| ESR1 Ext F3               | TTGGAGGTTTGGGAGTTTAG              | -18 to +280 Transcript variant 1              |
| ESR1 Ext R(4)             | ACAATAAAACCATCCCAAATAC            |                                               |
| ESR1 FM 2                 | AGGGCGTTCGTTTTGGGATTG             |                                               |
| ESR1 FUM2                 | TGGTGGAGGGTGTGTTGTTTTG            |                                               |
| ESR1 RM 2                 | CGCCGACACGCGAACTCTAA              |                                               |
| ESR1 RUM2                 | ATCCCACCAACACACAAACTC             |                                               |
| ESR1 UM Probe             | 6FAM-AATCCAATAAAACCAAACAACCCAACAA |                                               |
| ESR1 M Probe              | VIC-CGATAAAACCGAACGACCCGACGA      |                                               |
|                           |                                   |                                               |
| HIN1 Ext R(3)             | AAACTACAAAACAAAACCAC              | SCGB3A1; -206 to +80                          |
| HIN1 Ext F(2)             | GTTTGTTAAGAGGAAGTTTT              |                                               |
| HIN1 FM                   | TAGGGAAGGGGTACGGGTTT              |                                               |
| HIN1-FUM (2)              | AAGTTTTTGAGGTTTGGGTAGGGA          |                                               |
| HIN1 RM                   | CGCTCACGACCGTACCCTAA              |                                               |
| HIN1 RUM (2)              | ACCAACCTCACCCACACTCCTA            |                                               |
| HIN1 UM Probe             | 6FAM-CAACTCCTACTACAACCAACAAACC    |                                               |
| HIN1 M Probe              | VIC-ACTCCTACTACGACCGACGAACC       |                                               |
|                           |                                   |                                               |
| RAR-□ Ext F               | GTAGGAGGGTTATTTTTTGTT             | +34 to +269                                   |
| RAR-□ Ext R(2)            | AATTACATTTTCCAACTTACTC            |                                               |
| RAR-□ FM                  | AGAACGCGAGCGATTGAGTAG             |                                               |
| RAR-□ FUM                 | TTGAGAATGTGAGTGATTTGAGTAG         |                                               |
| RAR-□ RM                  | TACAAAAAACCTTCCGAATACGTT          |                                               |
| RAR-□ RUM                 | TTACAAAAAACCTTCCAAATACATTC        |                                               |
| RAR-□ UM Probe            | 6FAM-AAATCCTACCCCAACAATACCCAAAC   |                                               |
| RAR-□ M Probe             | VIC-ATCCTACCCCGACGATACCCAAAC      |                                               |
|                           |                                   |                                               |
| RASSF1A Ext F(2)          | GTTTTATAGTTTTTGTATTTAGG           | -38 to +160                                   |
| RASSF1A Ext R(2)          | AACTCAATAAACTCAAACCTCCC           |                                               |
| RASSF1A FM                | GCGTTGAAGTCGGGGTTC                |                                               |
| RASSF1A FUM               | GGTGTGAAGTTGGGGTTTG               |                                               |
| RASSF1A RM                | CCCGTACTTCGCTAACTTTAAACG          |                                               |
| RASSF1A RUM               | CCCATACTTCACTAACTTTAAAC           |                                               |
| RASSF1A UM Probe          | 6FAM-CTAACAAACACAAACCAAACAAAACCA  |                                               |
| RASSF1A M Probe           | VIC-ACAAACGCGAACCGAACGAAACCA      |                                               |

| <b>Primers and Probes</b> | <b>Sequences</b>               | <b>Distance to transcriptional start site</b> |
|---------------------------|--------------------------------|-----------------------------------------------|
| TWIST Ext F(3)            | GAGATGAGATATTATTTATTGTG        | -415 to -162                                  |
| TWIST Ext R(4)            | CCTCCCAAACCATTCAAAAAC          |                                               |
| TWIST FM                  | GTTAGGGTTCGGGGGCGTTGTT         |                                               |
| TWIST FUM (3)             | GGTTTGGGGGTGTTGTTTGTATG        |                                               |
| TWIST RM                  | CCGTCGCCTTCCTCCGACGAA          |                                               |
| TWIST RUM (5)             | CCATCACCTTCCTCCAACAAAC         |                                               |
| TWIST UM Probe            | 6FAM-AAACAATTCCTTCCCCACCAAAACA |                                               |
| TWIST M Probe             | VIC-AAACGATTCCTTCCCCGCCGAAA    |                                               |
